# Supplementary material
Source: PubMed Central journal article supplement (PMC5538775)

# Fmoc-Sec(Xan)-OH: Synthesis and Utility of Fmoc Selenocysteine SPPS Derivatives with Acid-Labile Sidechain Protection

Stevenson Flemer Jr.\*

\* Department of Biochemistry, Room B415 Given Bldg, 89 Beaumont Ave, University of Vermont,  
Burlington, VT 05405

SUPPORTING INFORMATION

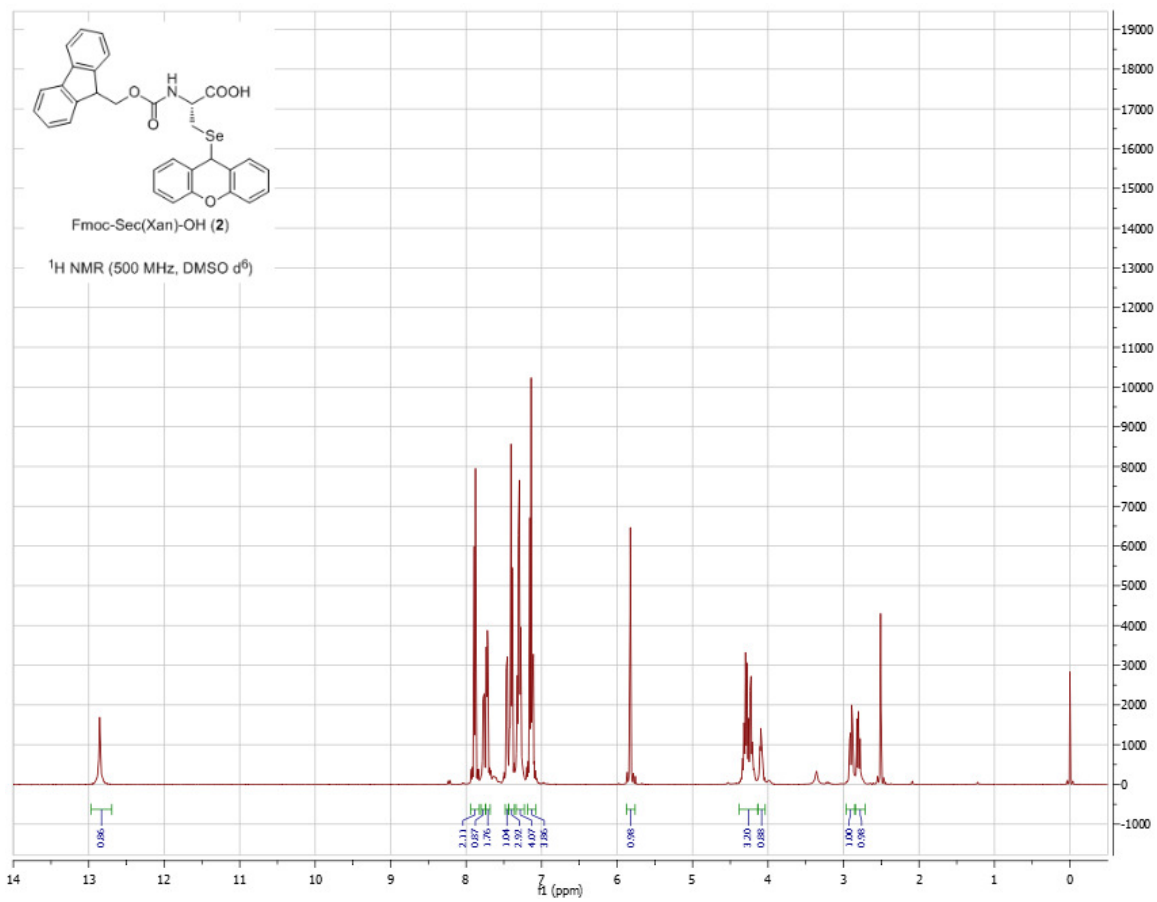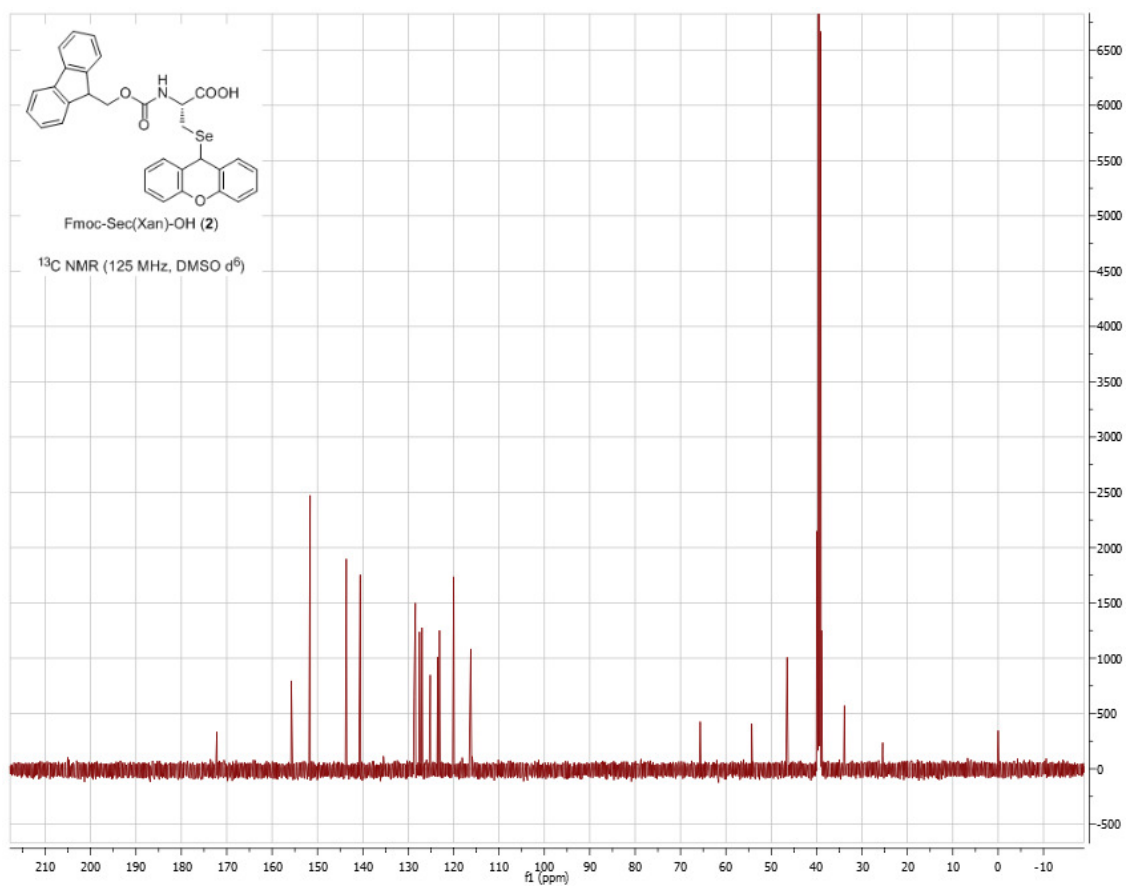

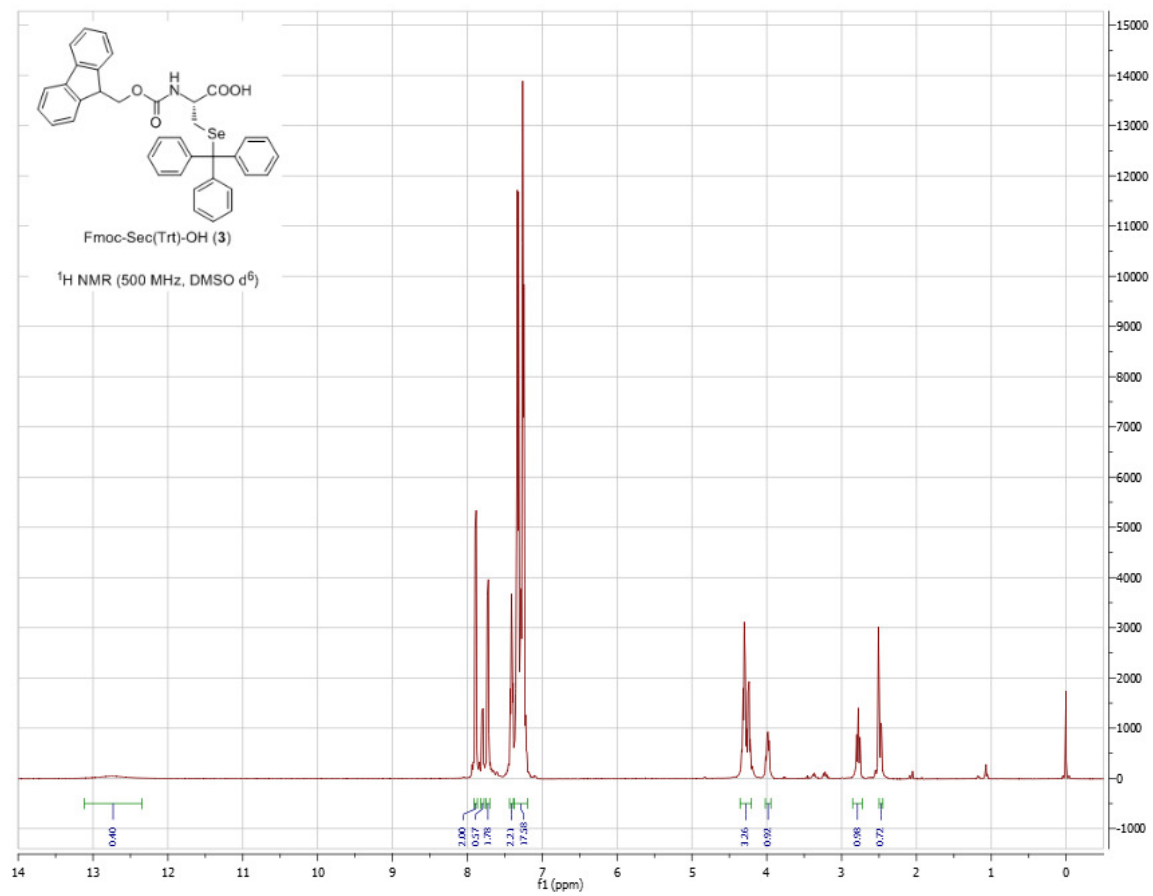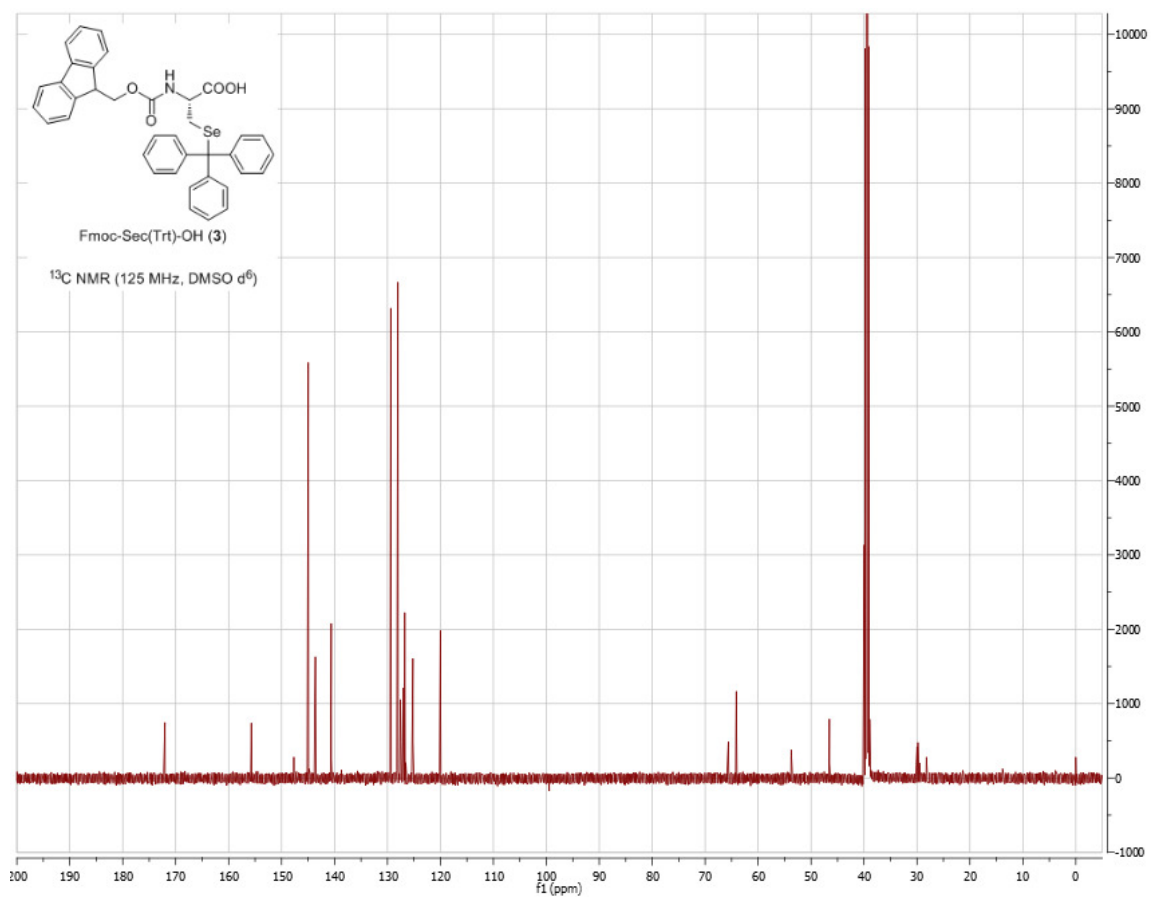

Supplement: NIHMS688902-supplement-Supp_Material.pdf [file NIHMS688902-supplement-Supp_Material.pdf]
